# Supplementary material for: Anion amphiphilic random copolymers and their performance as stabilizers for O/W nanoemulsions
Source: Royal Society of Chemistry journal article supplement (doi:10.1039/c9ra01383k), 2019-01-01
Supplement: c9ra01383k1.pdf [file c9ra01383k1.pdf]

## Supplementary Information

### Anion Amphiphilic Random Copolymers and their Performance as Stabilizers for O/W Nanoemulsions

Fangfang Peng, Yangchuan Ke\*, Shichao Lu, Yi Zhao, Xu Hu, Qingchun Deng

College of Science, China University of Petroleum, Beijing, 102249, Correspondence to  
[kyc012@sohu.com](mailto:kyc012@sohu.com)

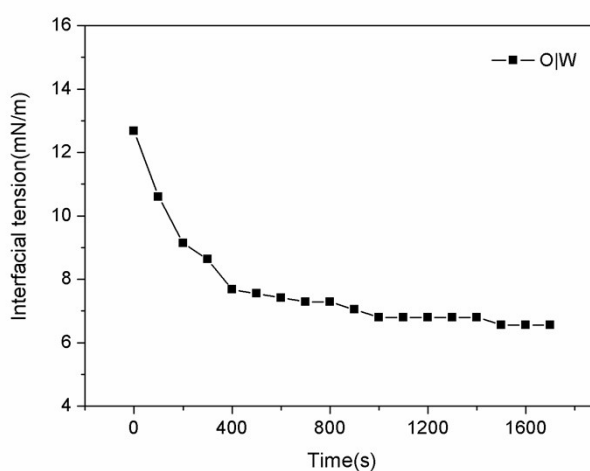

Fig. S1 Interfacial tension of crude oil/ water as a function of time at 45 °C

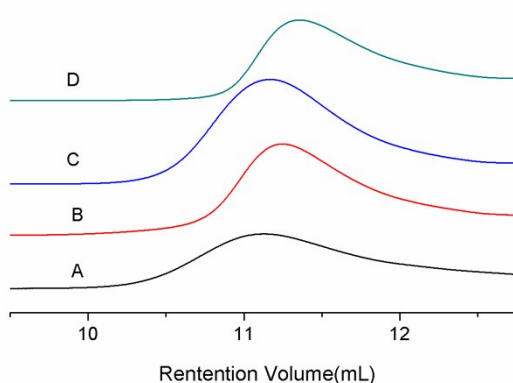

Fig.S2 GPC curves of p (SSS) -ran-p (LMA) amphiphilic random copolymers in water.  
(A)SL57, (B) SL33, (C) SL75,(D) SL42

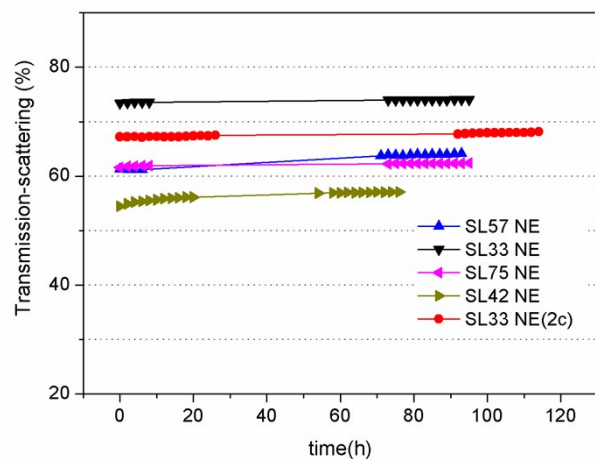

Fig. S3 Transmission-scattering (%T) of nanoemulsions as a function of time

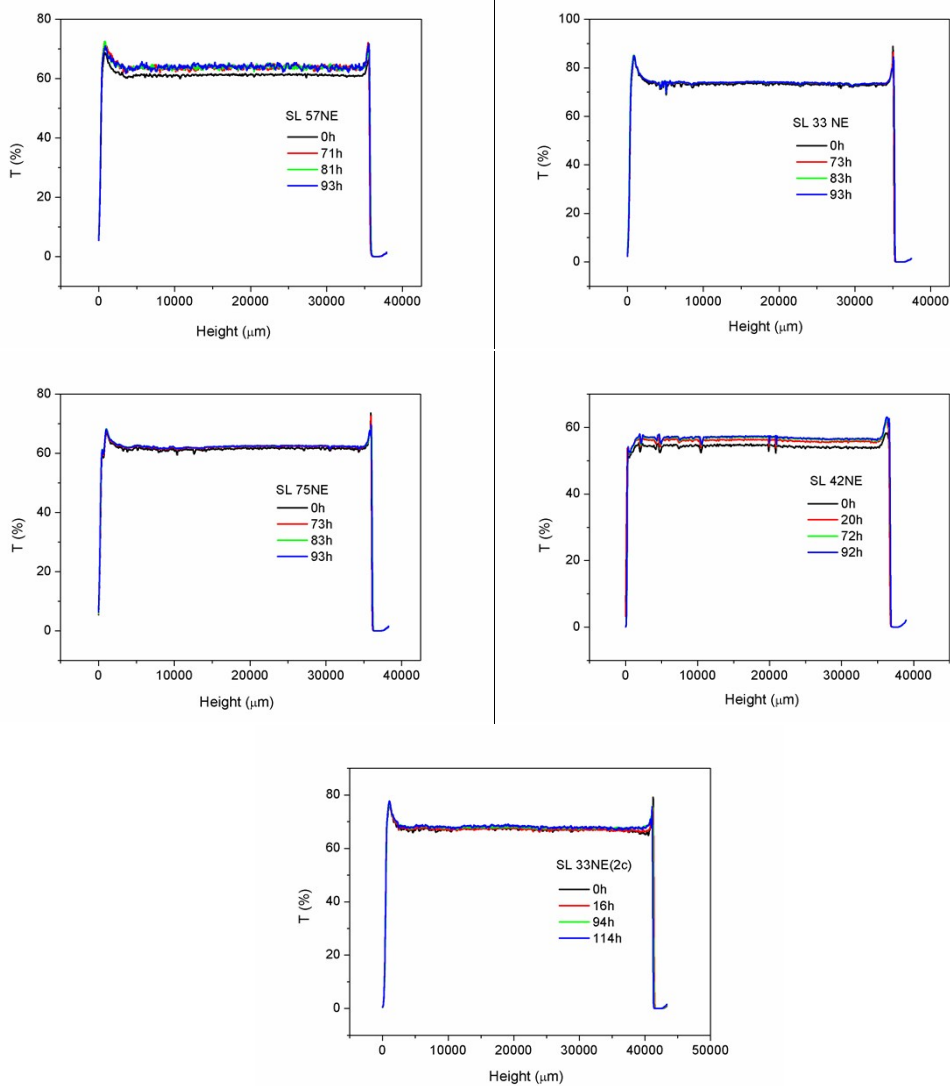

Fig. S4 Transmission-scattering (%T) profiles of nanoemulsions as a function of time and tube length

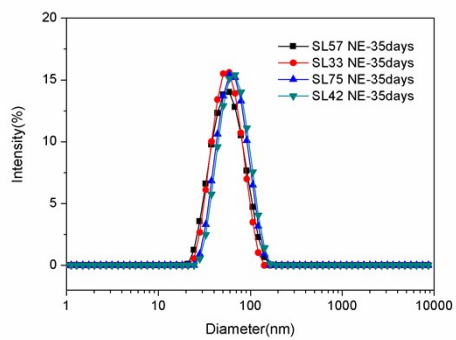

Fig. S5 Diameter of nanoemulsions storage for 35days

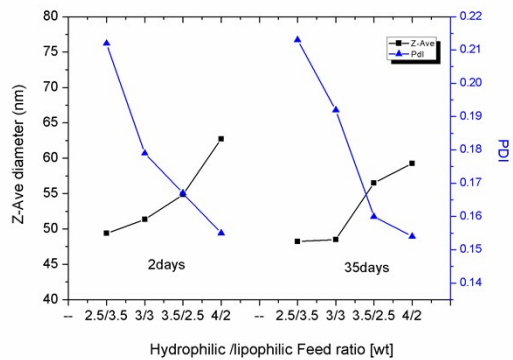

Fig. S6 Comparison of Z-Ave diameter and polydispersity index(PID) of nanoemulsion storage for 2days and 35days
